# Supplementary material for: {VMo9O31[RC(CH2O)3]}6−: the first class of triol ligand covalently-decorated Keggin-type polyoxomolybdates
Source: Royal Society of Chemistry journal article supplement (doi:10.1039/d0dt02506b), 2020-01-01
Supplement: d0dt02506b1.pdf [file d0dt02506b1.pdf]

## Electronic Supplementary Information (ESI) for Dalton Trans.

### **$\{\text{VMo}_9\text{O}_{31}[\text{RC}(\text{CH}_2\text{O})_3]\}^{6-}$ : the first class of triol ligand covalently-decorated Keggin-type polyoxomolybdates**

Di Qu,<sup>a</sup> Xiaoting Liu,<sup>a</sup> Fengxue Duan,<sup>a</sup> Rong Xue,<sup>\*b</sup> Bao Li<sup>\*a</sup> and Lixin Wu<sup>a</sup>

<sup>a</sup>State Key Laboratory of Supramolecular Structure and Materials, College of Chemistry, Jilin University, Changchun 130012, P. R. China

E-mail: libao@jlu.edu.cn

<sup>b</sup>National Analytical Research Center of Electrochemistry and Spectroscopy, Changchun Institute of Applied Chemistry, Chinese Academy of Sciences, 5625 Renmin Street, Changchun 130022, P. R. China

E-mail: xuerong@ciac.ac.cn

#### Content

|                                                                                                                                                                   |    |
|-------------------------------------------------------------------------------------------------------------------------------------------------------------------|----|
| Materials.....                                                                                                                                                    | S2 |
| Measurement.....                                                                                                                                                  | S2 |
| Synthesis.....                                                                                                                                                    | S2 |
| • Synthesis of $(\text{NH}_4)_6\{\text{VMo}_9\text{O}_{31}[\text{CH}_3\text{C}(\text{CH}_2\text{O})_3]\} \cdot 9\text{H}_2\text{O}$ ( <b>1</b> ) .....            | S2 |
| • Synthesis of $(\text{NH}_4)_6\{\text{VMo}_9\text{O}_{31}[\text{CH}_3\text{CH}_2\text{C}(\text{CH}_2\text{O})_3]\} \cdot 9\text{H}_2\text{O}$ ( <b>2</b> ) ..... | S2 |
| • Synthesis of $(\text{NH}_4)_6\{\text{VMo}_9\text{O}_{31}[\text{HOCH}_2\text{C}(\text{CH}_2\text{O})_3]\} \cdot 9\text{H}_2\text{O}$ ( <b>3</b> ) .....          | S2 |
| Single-crystal X-ray diffraction data for compounds <b>1–3</b> .....                                                                                              | S3 |
| Size comparison of the same part in the different structures.....                                                                                                 | S3 |
| IR and TGA data for compounds <b>1–3</b> .....                                                                                                                    | S4 |
| Symmetry of polyanion <b>1a</b> .....                                                                                                                             | S6 |
| Transformation between A- and B-type polyanion.....                                                                                                               | S6 |
| <sup>1</sup> H NMR data for compounds <b>2</b> and <b>3</b> .....                                                                                                 | S7 |
| <sup>51</sup> V NMR data for compounds <b>1–3</b> .....                                                                                                           | S7 |
| Calculation of $E_d$ .....                                                                                                                                        | S9 |
| The distances of lattice water molecules in compound <b>1</b> .....                                                                                               | S9 |

## Materials

All chemicals were purchased from Aladdin and were used without further purification. The water used in the experiment is high purity water.

## Measurement

FT-IR spectra were recorded on a Bruker Vertex 80v spectrometer equipped with a DTGS detector (32 scans) with the resolution of  $4\text{ cm}^{-1}$  using KBr pellets. Elemental analysis for C, H, and N was carried out on a Vario MICRO cube of Elementar Company. Elemental analysis for V and Mo was taken on a PLASMA-SPEC (I) inductively coupled plasma atomic emission spectrometer. Thermo gravimetric analysis (TGA) was carried out on a TA Instruments Q500 Thermal Analyzer with flow of nitrogen, and the temperature was set from 30 to 900 °C under a heating rate of  $10\text{ °C}\cdot\text{min}^{-1}$ .  $^1\text{H}$  NMR and  $^{51}\text{V}$  spectra were conducted on a Bruker AVANCE 500 MHz spectrometer. Single-crystal X-ray diffraction indexing and data collection were performed on Bruker D8 Venture diffractometer with graphite-monochromated Mo  $K_{\alpha}$  ( $\lambda=0.71073\text{ \AA}$ ) at 293 K. All complexes were solved by direct method and refined by full-matrix-least-squares fitting on  $F^2$  using the SHELXTL software. All non-H atoms, except some lattice water molecules, were refined with anisotropic thermal parameters.

## Synthesis

**Synthesis of  $(\text{NH}_4)_6\{\text{VMo}_9\text{O}_{31}[\text{CH}_3\text{C}(\text{CH}_2\text{O})_3]\}\cdot 9\text{H}_2\text{O}$  (1).** A mixture of  $\text{V}_2\text{O}_5$  (0.36 g, 2.00 mmol),  $(\text{NH}_4)_6\text{Mo}_7\text{O}_{24}\cdot 4\text{H}_2\text{O}$  (2.47 g, 2.00 mmol) and  $\text{CH}_3\text{C}(\text{CH}_2\text{OH})_3$  (0.96 g, 0.80 mmol) was dissolved in 20 mL of water and the mixture was heated to 80 °C for 2 h under stirring. The formed yellow solution was cooled to room temperature and the crystals in light yellow color formed about after 1 day with the yield of 56.8% based on Mo. The pH values before and after reaction were 5.67 and 5.45, respectively. Elem. anal. Calcd. for  $(\text{NH}_4)_6\{\text{VMo}_9\text{O}_{31}[\text{CH}_3\text{C}(\text{CH}_2\text{O})_3]\}\cdot 9\text{H}_2\text{O}$ : V, 2.83; Mo, 48.01; C, 3.34; H, 2.84; N, 4.67. Found: V, 2.96; Mo, 48.05; C, 3.45; H, 2.90; N, 4.64. IR (KBr,  $\text{cm}^{-1}$ ): 3573, 3161, 3033, 2866, 2814, 1612, 1402, 1216, 1043, 960, 924, 838, 642, 518, and 478.

**Synthesis of  $(\text{NH}_4)_6\{\text{VMo}_9\text{O}_{31}[\text{CH}_3\text{CH}_2\text{C}(\text{CH}_2\text{O})_3]\}\cdot 9\text{H}_2\text{O}$  (2).** A mixture of  $\text{V}_2\text{O}_5$  (0.36 g, 2.00 mmol),  $(\text{NH}_4)_6\text{Mo}_7\text{O}_{24}\cdot 4\text{H}_2\text{O}$  (2.47 g, 2.00 mmol) and  $\text{CH}_3\text{CH}_2\text{C}(\text{CH}_2\text{OH})_3$  (1.07 g, 0.80 mmol) was dissolved in 20 mL of water and the mixture solution was heated to 80 °C for 2 h. The resulted yellow solution was cooled to room temperature and the light-yellow crystals can be obtained about after 1 day with the yield of 57.8% based on Mo. The pH values before and after reaction were 5.43 and 5.39, respectively. Elem. anal. Calcd. for  $(\text{NH}_4)_6\{\text{VMo}_9\text{O}_{31}[\text{CH}_3\text{C}(\text{CH}_2\text{O})_3]\}\cdot 9\text{H}_2\text{O}$ : V, 2.83; Mo, 47.68; C, 3.97; H, 2.93; N, 4.64. Found: V, 2.79; Mo, 47.64; C, 4.03; H, 2.93; N, 4.63. IR (KBr,  $\text{cm}^{-1}$ ): 3556, 3130, 3026, 2876, 2824, 1612, 1400, 1205, 1043, 960, 924, 848, 640, 507, and 478.

**Synthesis of  $(\text{NH}_4)_6\{\text{VMo}_9\text{O}_{31}[\text{HOCH}_2\text{C}(\text{CH}_2\text{O})_3]\}\cdot 9\text{H}_2\text{O}$  (3).** A mixture of  $\text{V}_2\text{O}_5$  (0.36 g, 2.00 mmol),  $(\text{NH}_4)_6\text{Mo}_7\text{O}_{24}\cdot 4\text{H}_2\text{O}$  (2.47 g, 2.00 mmol) and  $\text{HOCH}_2\text{C}(\text{CH}_2\text{OH})_3$  (1.09 g, 0.80 mmol) in 20 mL of water was heated to 80 °C for 2 h. The yellow solution was cooled to room temperature and was kept for about 1 day to obtain light-yellow crystals with the yield of 55.0% based on Mo. The pH values before and after reaction were 5.76 and 5.38, respectively. Elem. anal. Calcd. for  $(\text{NH}_4)_6\{\text{VMo}_9\text{O}_{31}[\text{CH}_3\text{C}(\text{CH}_2\text{O})_3]\}\cdot 9\text{H}_2\text{O}$ : V, 2.81; Mo, 47.63; C, 3.31; H, 2.81; N, 4.63. Found: V, 2.78; Mo, 47.32; C, 3.68; H, 2.85; N, 4.63. IR (KBr,  $\text{cm}^{-1}$ ): 3514, 3137, 3024, 2876, 2802, 1614, 1398, 1240, 1020, 960, 648, 516, and 476.

### Single-crystal X-ray diffraction data for compounds 1–3

**Table S1** The summary of crystal data and structure refinements for compounds 1–3.

|                                                                 | <b>1</b>                                                                                                                                  | <b>2</b>                                                                                                                                                  | <b>3</b>                                                                                                                                    |
|-----------------------------------------------------------------|-------------------------------------------------------------------------------------------------------------------------------------------|-----------------------------------------------------------------------------------------------------------------------------------------------------------|---------------------------------------------------------------------------------------------------------------------------------------------|
| Formula                                                         | (NH <sub>4</sub> ) <sub>6</sub> {VMo <sub>9</sub> O <sub>31</sub> [CH <sub>3</sub> C(CH <sub>2</sub> O) <sub>3</sub> ]}·9H <sub>2</sub> O | (NH <sub>4</sub> ) <sub>6</sub> {VMo <sub>9</sub> O <sub>31</sub> [CH <sub>3</sub> CH <sub>2</sub> C(CH <sub>2</sub> O) <sub>3</sub> ]}·9H <sub>2</sub> O | (NH <sub>4</sub> ) <sub>6</sub> {VMo <sub>9</sub> O <sub>31</sub> [HOCH <sub>2</sub> C(CH <sub>2</sub> O) <sub>3</sub> ]}·9H <sub>2</sub> O |
| F. W.                                                           | 1797.92                                                                                                                                   | 1811.94                                                                                                                                                   | 1813.92                                                                                                                                     |
| S. G.                                                           | <i>Cmc</i> 2 <sub>1</sub>                                                                                                                 | <i>P</i> -1                                                                                                                                               | <i>Cmc</i> 2 <sub>1</sub>                                                                                                                   |
| a (Å)                                                           | 13.858(5)                                                                                                                                 | 10.497(1)                                                                                                                                                 | 13.876(1)                                                                                                                                   |
| b (Å)                                                           | 15.952(4)                                                                                                                                 | 10.558(1)                                                                                                                                                 | 16.020(1)                                                                                                                                   |
| c (Å)                                                           | 20.649(5)                                                                                                                                 | 21.911(1)                                                                                                                                                 | 20.658(1)                                                                                                                                   |
| α (deg)                                                         | 90                                                                                                                                        | 95.23(1)                                                                                                                                                  | 90                                                                                                                                          |
| β (deg)                                                         | 90                                                                                                                                        | 102.32(1)                                                                                                                                                 | 90                                                                                                                                          |
| γ (deg)                                                         | 90                                                                                                                                        | 97.400(1)                                                                                                                                                 | 90                                                                                                                                          |
| V (Å <sup>3</sup> )                                             | 4565(2)                                                                                                                                   | 2335(1)                                                                                                                                                   | 4593(1)                                                                                                                                     |
| Z                                                               | 4                                                                                                                                         | 2                                                                                                                                                         | 4                                                                                                                                           |
| D <sub>c</sub> (g cm <sup>-3</sup> )                            | 2.616                                                                                                                                     | 2.577                                                                                                                                                     | 2.686                                                                                                                                       |
| <i>F</i> (000)                                                  | 3472                                                                                                                                      | 1752                                                                                                                                                      | 3504                                                                                                                                        |
| Reflections coll./unique                                        | 28379/5411                                                                                                                                | 73589/10651                                                                                                                                               | 23232/5282                                                                                                                                  |
| <i>R</i> <sub>int</sub>                                         | 0.0234                                                                                                                                    | 0.0265                                                                                                                                                    | 0.0328                                                                                                                                      |
| GOF on <i>F</i> <sup>2</sup>                                    | 1.141                                                                                                                                     | 1.116                                                                                                                                                     | 1.075                                                                                                                                       |
| <i>R</i> <sub>1</sub> <sup>a</sup> [ <i>I</i> > 2σ( <i>I</i> )] | 0.0168                                                                                                                                    | 0.0322                                                                                                                                                    | 0.0260                                                                                                                                      |
| <i>wR</i> <sub>2</sub> <sup>b</sup> (all data)                  | 0.0488                                                                                                                                    | 0.0830                                                                                                                                                    | 0.0677                                                                                                                                      |

<sup>a</sup>  $R_1 = \sum ||F_o| - |F_c|| / \sum |F_o|$ . <sup>b</sup>  $wR_2 = \sum [w(F_o^2 - F_c^2)^2] / \sum [w(F_o^2)^2]^{1/2}$ .

### Size comparison of the same part in different structures

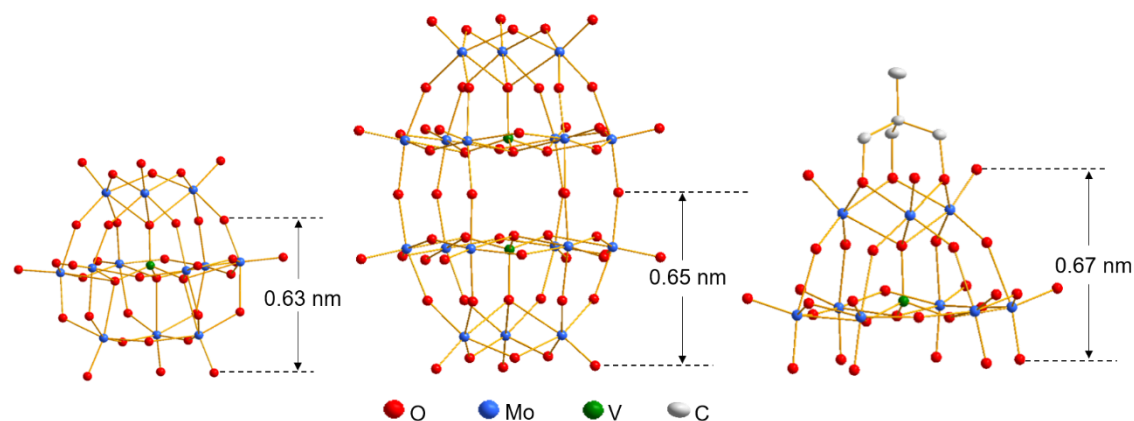

**Fig. S1** Ball-and-stick representations of left: Keggin-type [VMo<sub>12</sub>O<sub>40</sub>]<sup>3-</sup>, middle: Dawson-type [V<sub>2</sub>Mo<sub>18</sub>O<sub>62</sub>]<sup>6-</sup> and right: polyanion **1a** {VMo<sub>9</sub>O<sub>31</sub>[CH<sub>3</sub>C(CH<sub>2</sub>O)<sub>3</sub>]}<sup>3-</sup>, showing the influence of triol ligand on the size of the cluster.

## IR and TGA data for compounds 1–3

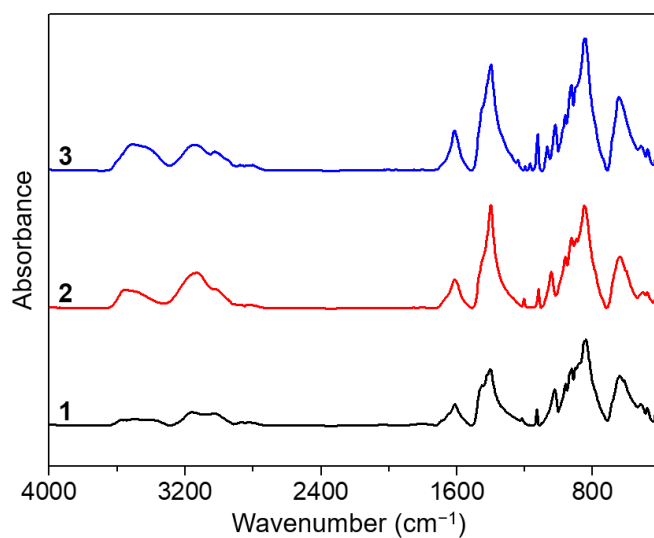

**Fig. S2** IR spectra of compounds **1–3** with the formulas of  $(\text{NH}_4)_6\{\text{VMo}_9\text{O}_{31}[\text{CH}_3\text{C}(\text{CH}_2\text{O})_3]\}\cdot 9\text{H}_2\text{O}$  (**1**),  $(\text{NH}_4)_6\{\text{VMo}_9\text{O}_{31}[\text{CH}_3\text{CH}_2\text{C}(\text{CH}_2\text{O})_3]\}\cdot 9\text{H}_2\text{O}$  (**2**) and  $(\text{NH}_4)_6\{\text{VMo}_9\text{O}_{31}[\text{HOCH}_2\text{C}(\text{CH}_2\text{O})_3]\}\cdot 9\text{H}_2\text{O}$  (**3**) in KBr.

**Table S2** The summary for detailed assignments of IR spectra of **1–3**.

| <b>1</b> ( $\text{cm}^{-1}$ ) | <b>2</b> ( $\text{cm}^{-1}$ ) | <b>3</b> ( $\text{cm}^{-1}$ ) | Assignments      |
|-------------------------------|-------------------------------|-------------------------------|------------------|
| 3573, 3161, 3033              | 3556, 3130, 3026              | 3514, 3137, 3024              | O–H and N–H str. |
| 2866, 2814                    | 2876, 2824                    | 2876, 2802                    | C–H str.         |
| 1612                          | 1612                          | 1614                          | O–H bending      |
| 1402                          | 1400                          | 1398                          | C–H bending      |
| 1216, 1043                    | 1205, 1043                    | 1240, 1020                    | C–O              |
| 960                           | 960                           | 960                           | Mo=O             |
| 924, 838                      | 924, 848                      | 925, 842                      | Mo–O–Mo          |
| 642, 518, 478                 | 640, 507, 478                 | 648, 516, 476                 | V–O              |

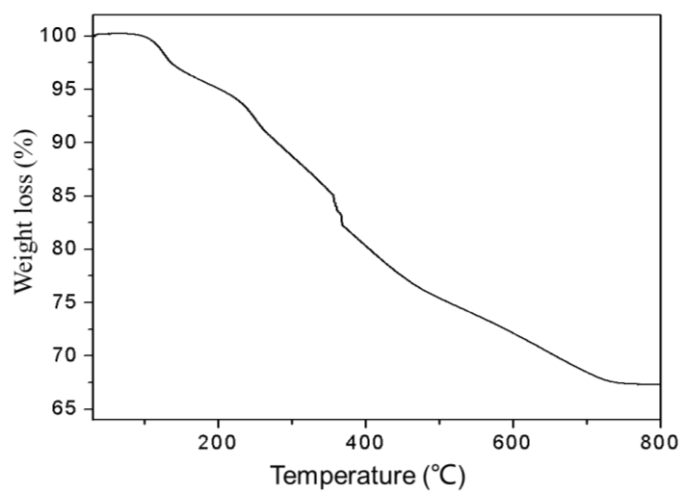

**Fig. S3** TGA curve of compound **1** with formula of  $(\text{NH}_4)_6\{\text{VMo}_9\text{O}_{31}[\text{CH}_3\text{C}(\text{CH}_2\text{O})_3]\} \cdot 9\text{H}_2\text{O}$ .

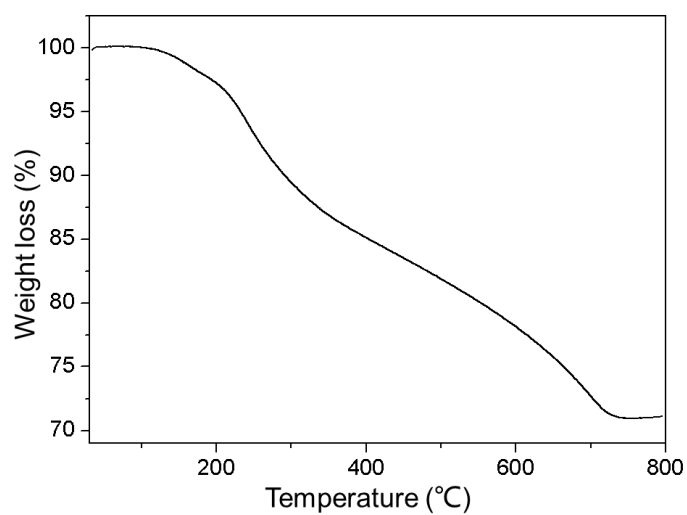

**Fig. S4** TGA curve of compound **2** with formula of  $(\text{NH}_4)_6\{\text{VMo}_9\text{O}_{31}[\text{CH}_3\text{CH}_2\text{C}(\text{CH}_2\text{O})_3]\} \cdot 9\text{H}_2\text{O}$ .

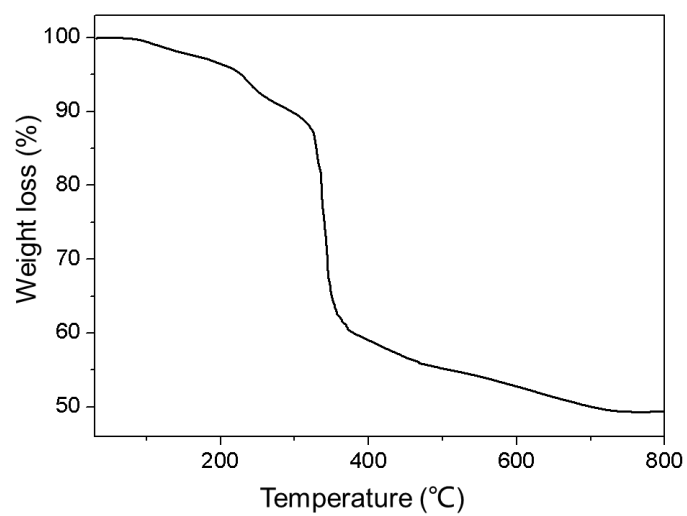

**Fig. S5** TGA curve of compound **3** with formula of  $(\text{NH}_4)_6\{\text{VMo}_9\text{O}_{31}[\text{HOCH}_2\text{C}(\text{CH}_2\text{O})_3]\} \cdot 9\text{H}_2\text{O}$ .

### Symmetry of polyanion **1a**

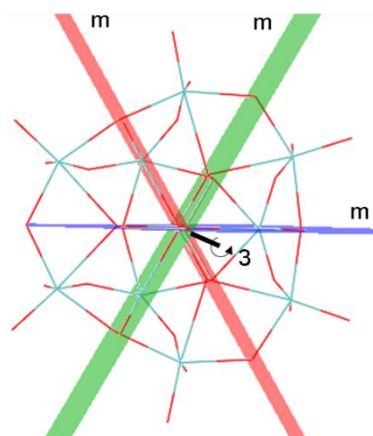

**Fig. S6** The wireframe drawing of polyanion **1a** showing the  $C_{3v}$  symmetry with one 3-fold axis and three mirrors through the rotation axis.

### Transformation between A- and B-type polyanion

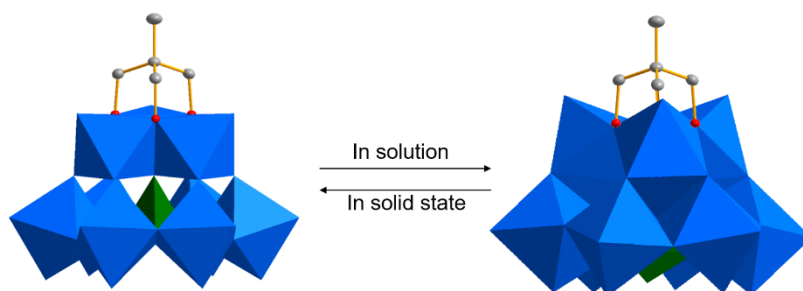

**Fig. S7** Combined polyhedral and ball-and-stick representation of polyanion **1a**, showing the different existing state in solution and solid state.

**<sup>1</sup>H NMR data for compounds 2 and 3**

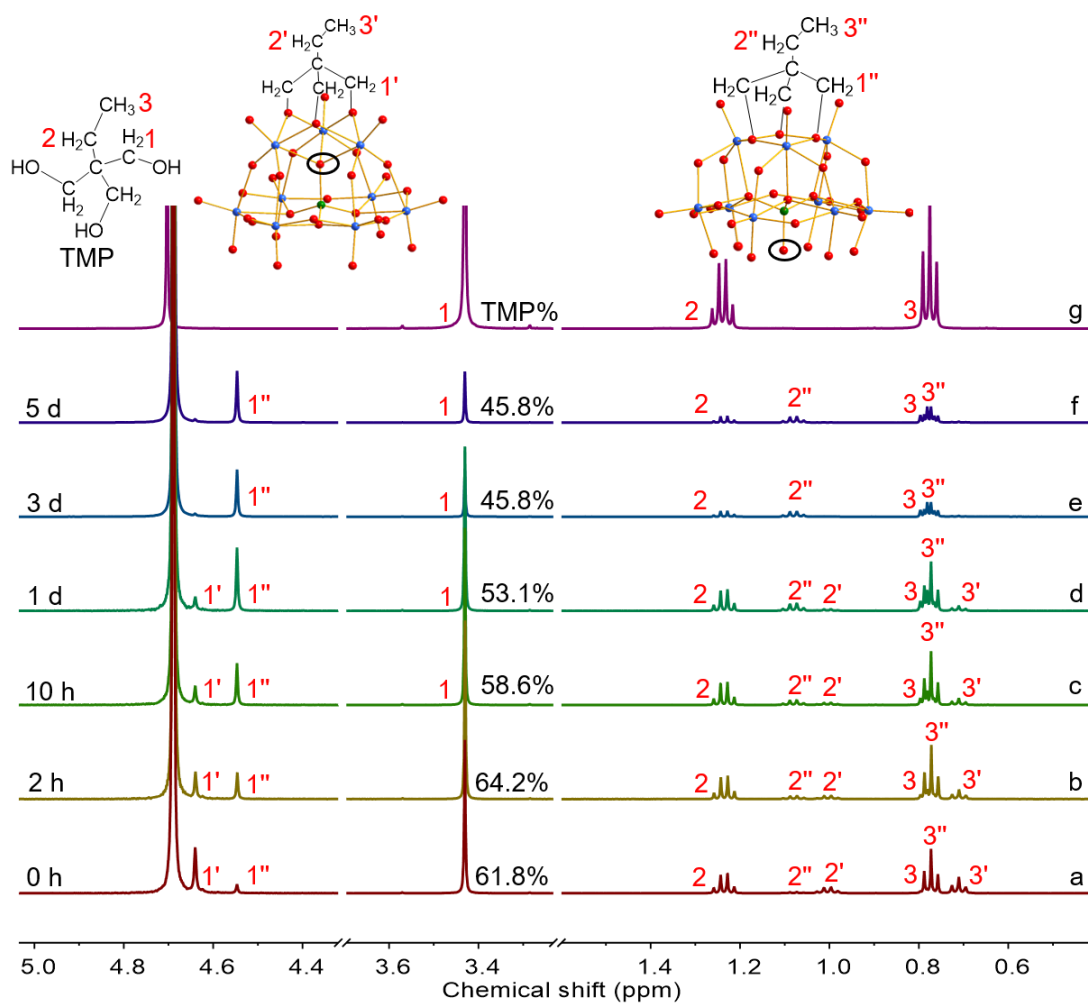

**Fig. S8** <sup>1</sup>H MNR spectra of compound 3 in D<sub>2</sub>O at various time: (a) 0 h, (b) 2 h, (c) 10 h, (d) 1 d, (e) 3 d, (f) 5 d and (g) trimethylolpropane (TMP). The temperature of the measurement is 25 °C. The different positions of the O atom in A- and B-type structures are marked with black circles.

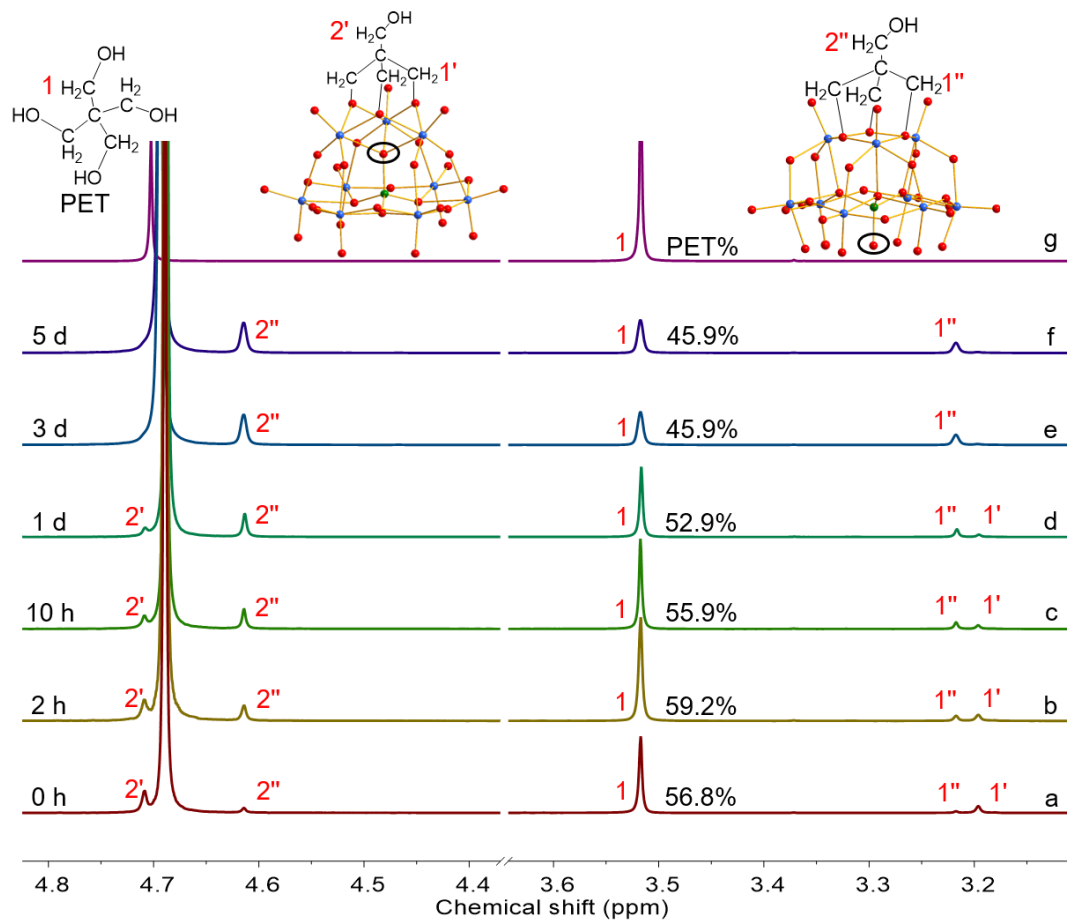

**Fig. S9**  $^1\text{H}$  NMR spectra of compound **3** in  $\text{D}_2\text{O}$  at various time: (a) 0 h, (b) 2 h, (c) 10 h, (d) 1 d, (e) 3 d, (f) 5 d and (g) pentaerythritol (PET). The temperature of the measurement is 25 °C. The different positions of the O atom in A- and B-type structures are marked with black circles.

### $^{51}\text{V}$ NMR data for compounds 1–3

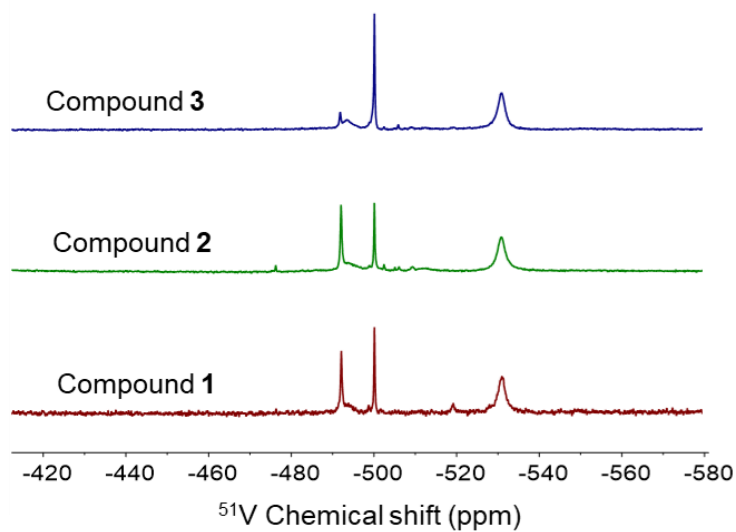

**Fig. S10**  $^{51}\text{V}$  NMR spectra of compounds **1–3** in  $\text{D}_2\text{O}$  at 25 °C.



### Calculation for $E_a$ .

The  $E_a$  of proton conduction was calculated from the following equation:

$$\ln(\sigma T) = \ln A - \frac{E_a}{k} \frac{1}{T}$$

where  $\sigma$  is the conductivity with the unit of S/cm, T is the temperature in Kelvin, k is the Boltzmann constant. After plotting  $\ln(\sigma T)$  as a function of inverse temperature, the slope of the fitted line would

be  $-\frac{E_a}{k}$ .

### The distances of lattice water molecules in compound 1.

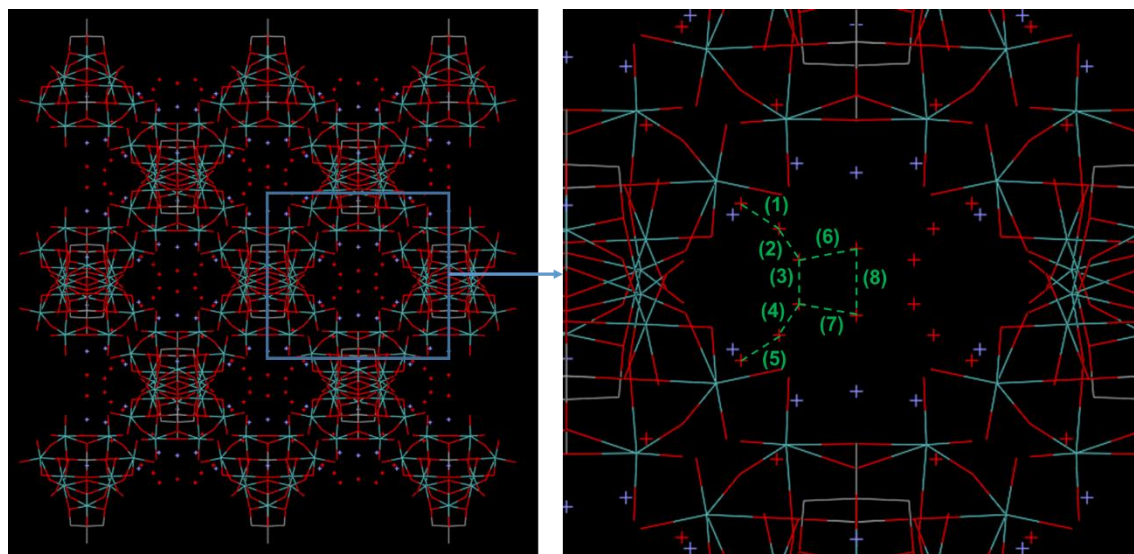

**Fig. S11** Left: the packing drawing of compound **1** along c axis; right: the amplification of the rectangle area in the left figure. The red stars represent the O atoms of water molecules. The dashed lines in green color represent distance between the neighboring water molecules and their values are (1) 10.783 Å, (2) 12.971 Å, (3) 10.379 Å, (4) 7.758 Å, (5) 9.982 Å, (6) 7.355 Å, (7) 7.355 Å, and (8) 10.447 Å, respectively.
